# Supplementary material for: Upregulation of the Renin–Angiotensin System Is Associated with Patient Survival and the Tumour Microenvironment in Glioblastoma
Source: MDPI journal article supplement (doi:10.3390/cells13070634), 2024-04-05
Supplement: s1 [file s1]

A

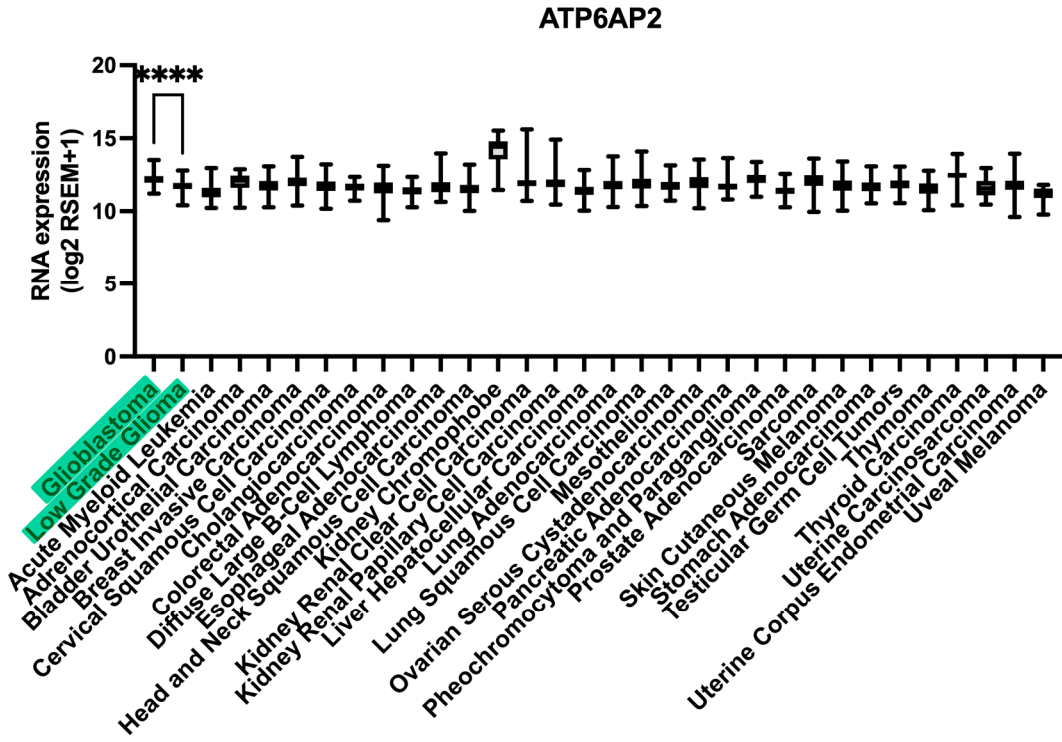

B

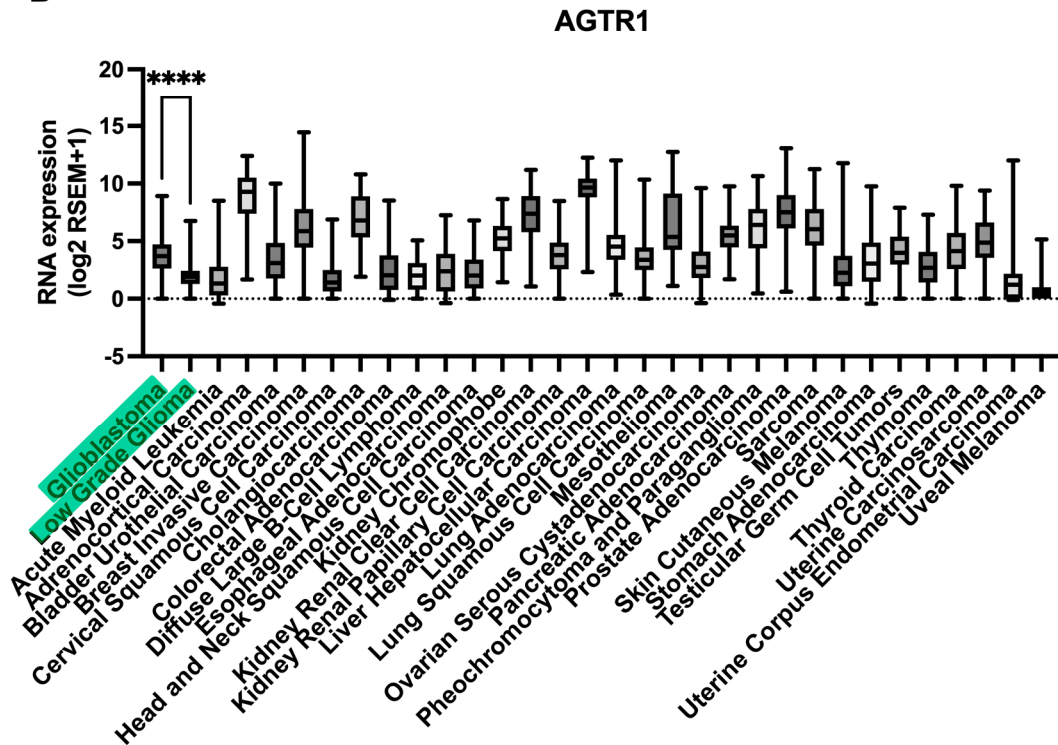

Figure S1 continued...

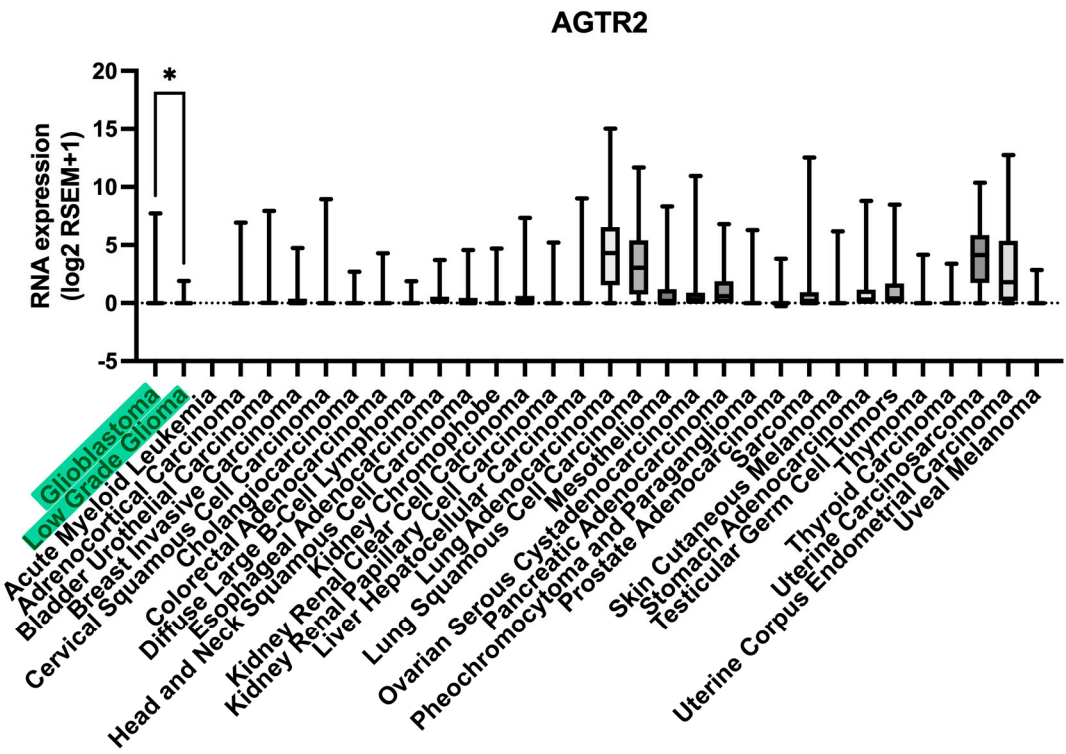

D

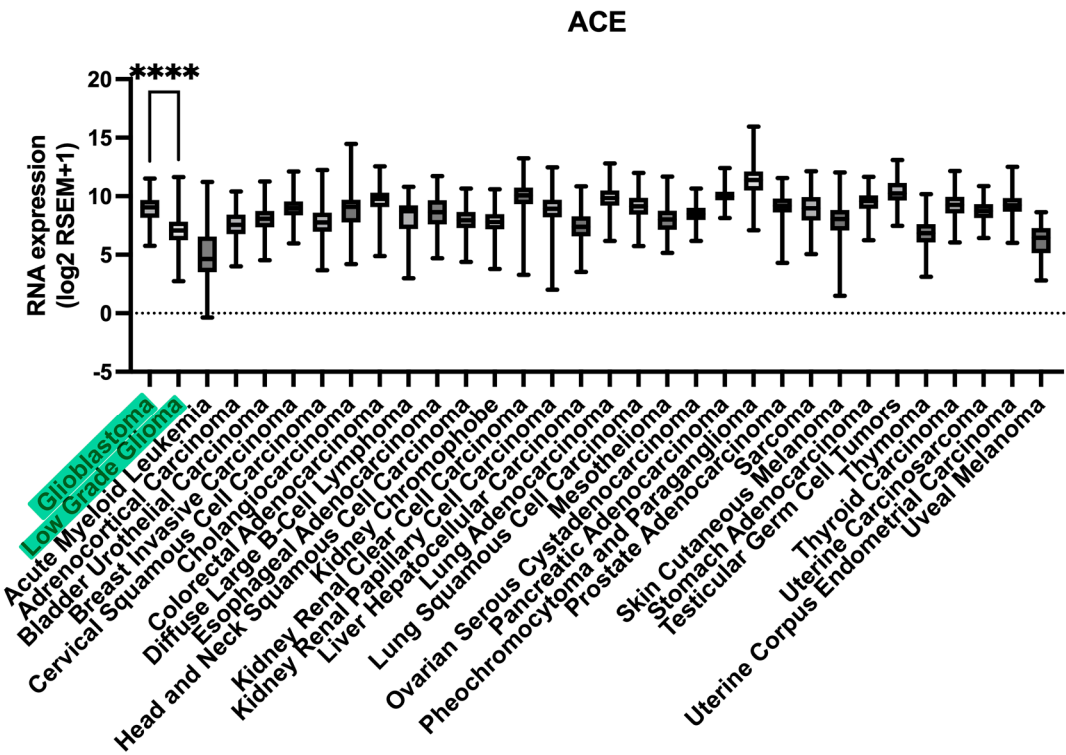

Figure S1 continued...

E

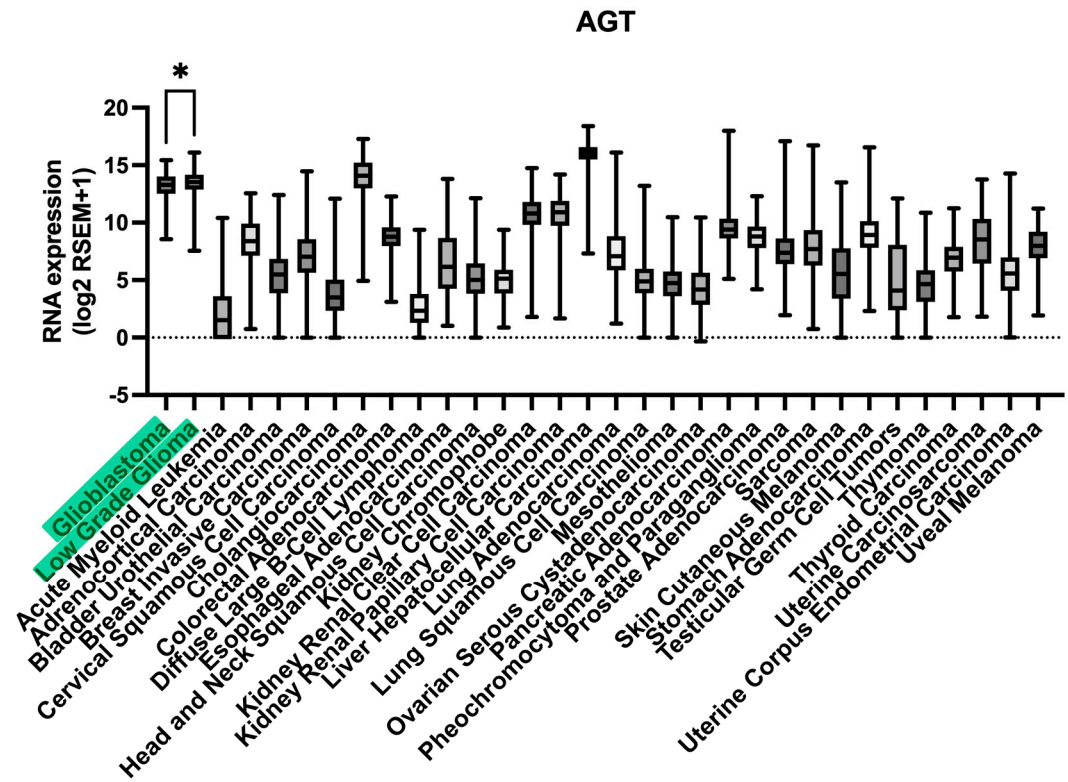

F

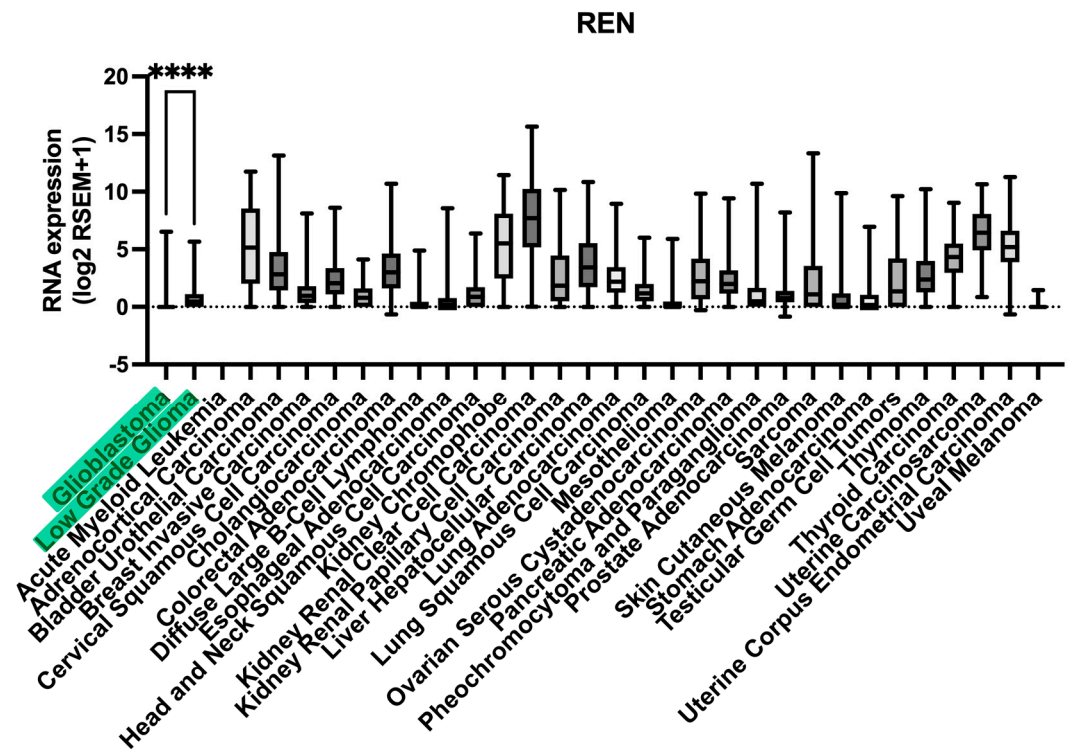

**Figure S1. RAS gene expression across TCGA PanCancer tumours.** RNA expression (log2 RSEM +1) of *ATP6AP2* (A) *AGTR1* (B), *AGTR2* (C), *ACE* (D), *AGT* (E) and *REN* (F) genes are shown across TCGA PanCancer patient samples. Data is represented as box plots. A Student's t-test was used to compare the levels of expression between the glioblastoma and LGG cohort (\*  $p < 0.05$ , \*\*  $p < 0.01$ , \*\*\*  $p < 0.001$ , \*\*\*\*  $p < 0.0001$ ), as also seen in Figure 1 of the main text. Glioblastoma and LGG are highlighted in green.

A

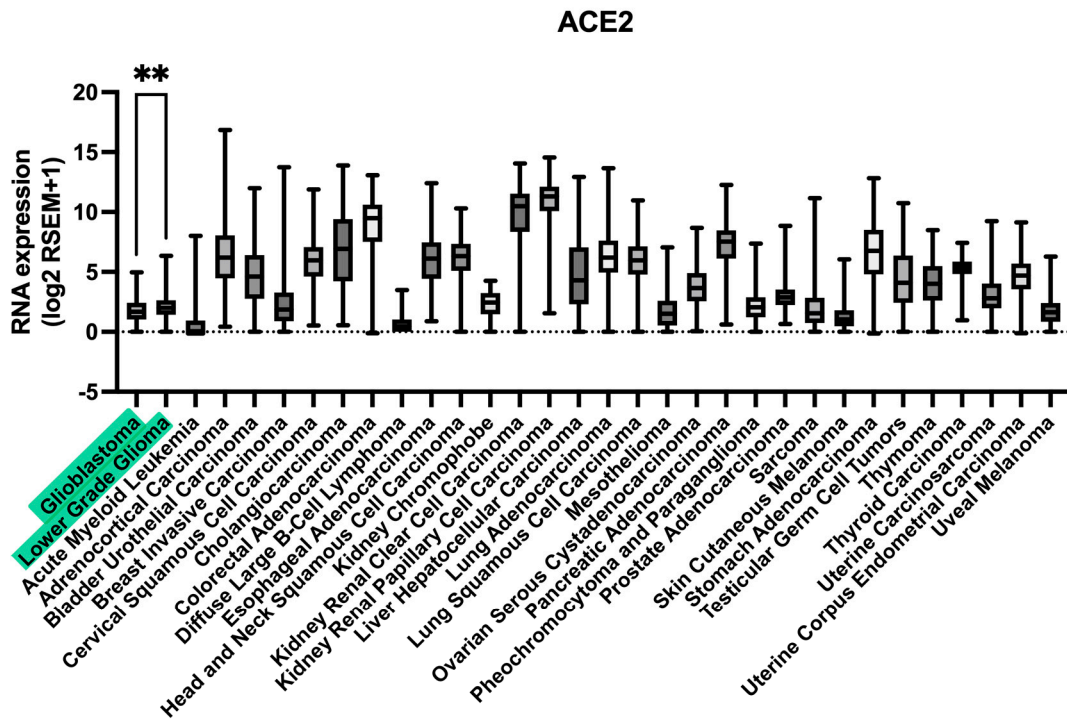

B

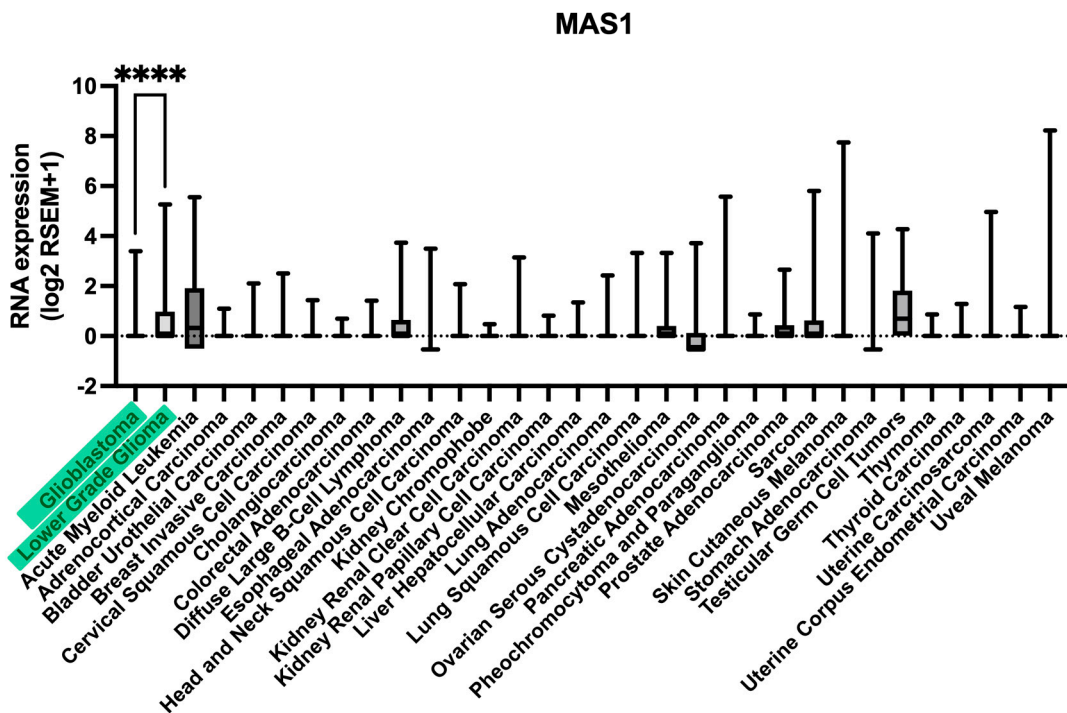

**Figure S2. ACE2 and MAS1 gene expression across TCGA PanCancer tumours.** RNA expression (log2 RSEM+1) of *ACE2* (A) and *MAS1* (B) are shown across TCGA PanCancer patient samples. Data is represented as box plots. A Student's t-test was used to compare the

levels of expression between the glioblastoma and LGG cohort (\*  $p < 0.05$ , \*\*  $p < 0.01$ , \*\*\*  $p < 0.001$ , \*\*\*\*  $p < 0.0001$ ). Glioblastoma and LGG are highlighted in green.

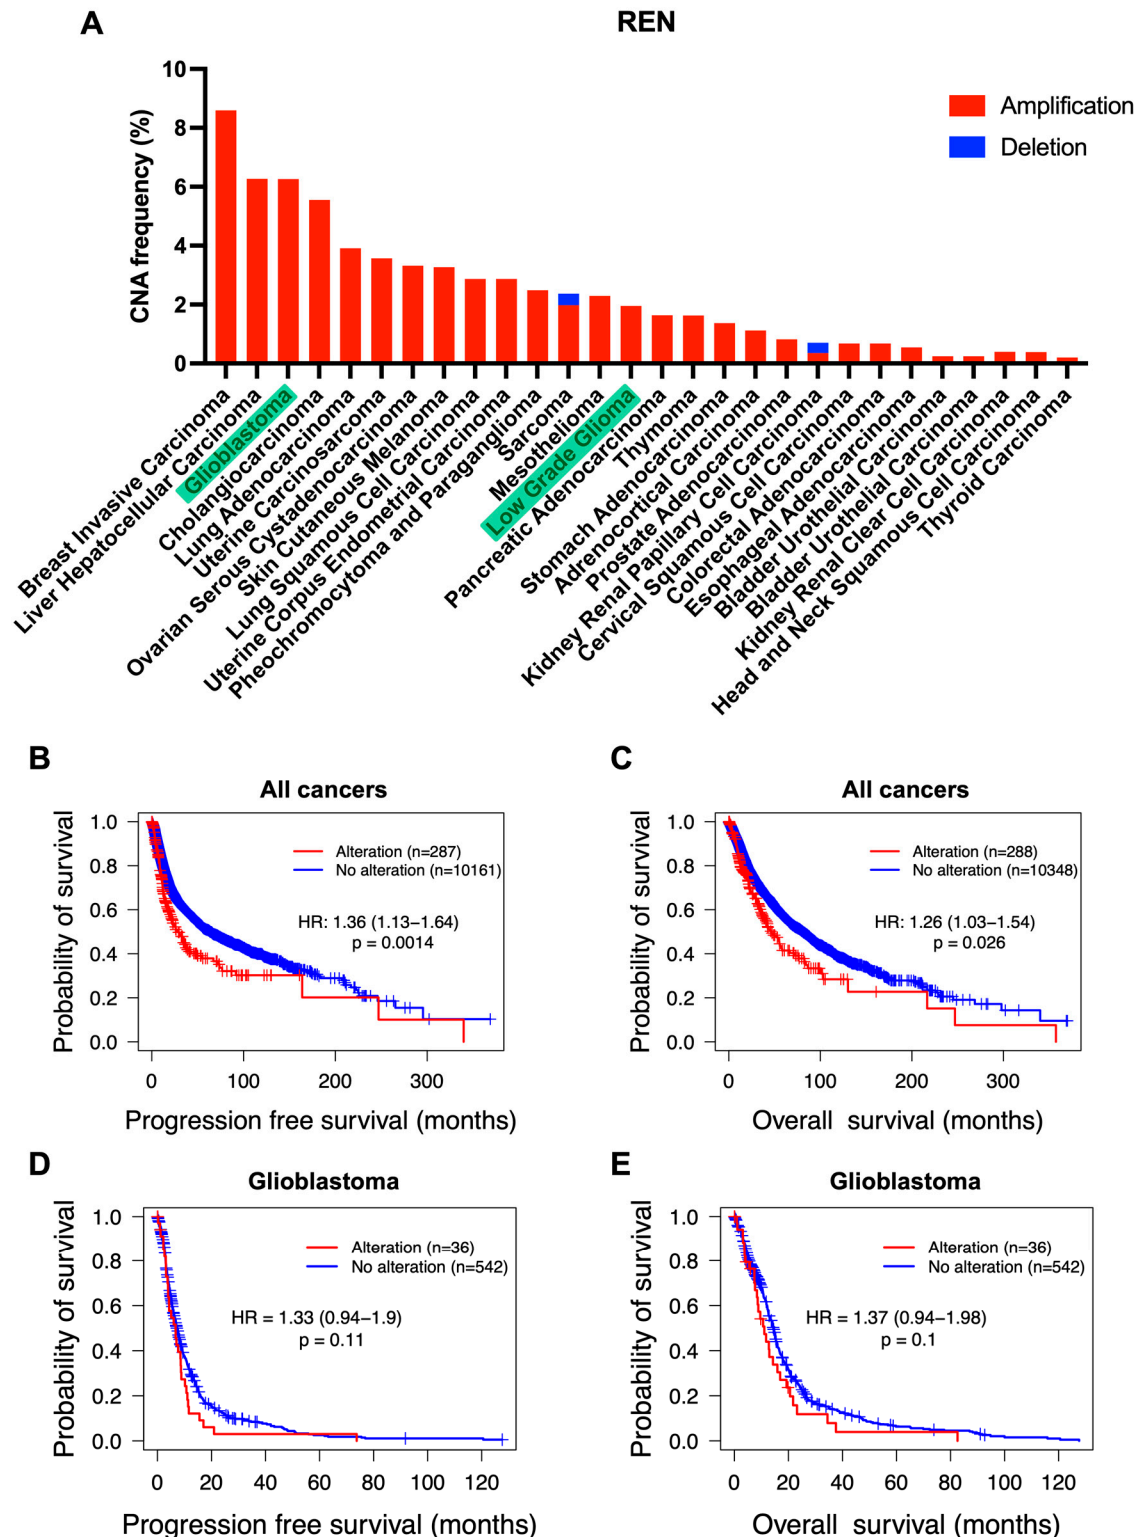

**Figure S3. Copy number alterations (CNA) of REN across PanCancer tumours and survival outcomes.** **A)** The frequency of CNA (amplification or deletion) are depicted across all cancer types from the TCGA PanCancer study, where glioblastoma (highlighted green) ranks the 3<sup>rd</sup> highest with 6% of samples displaying an alteration that contains amplifications of this gene. **B-C)** Kaplan-Meier plots are depicted for PFS and OS of all PanCancer cases containing CNA alterations or not, with hazard ratios and *p*-values shown after multivariate cox regression. Age, sex, and cancer type were significant clinical factors that were used in

multivariate cox analysis, with *REN* alterations significantly associated with poorer PFS and OS. **D-E)** Kaplan-Meier plots are displayed for PFS and OS of glioblastoma cases containing CNA alterations of *REN* vs no alteration. Hazard ratios and *p*-values are shown after univariate cox regression, where no significant difference was found for PFS or OS.



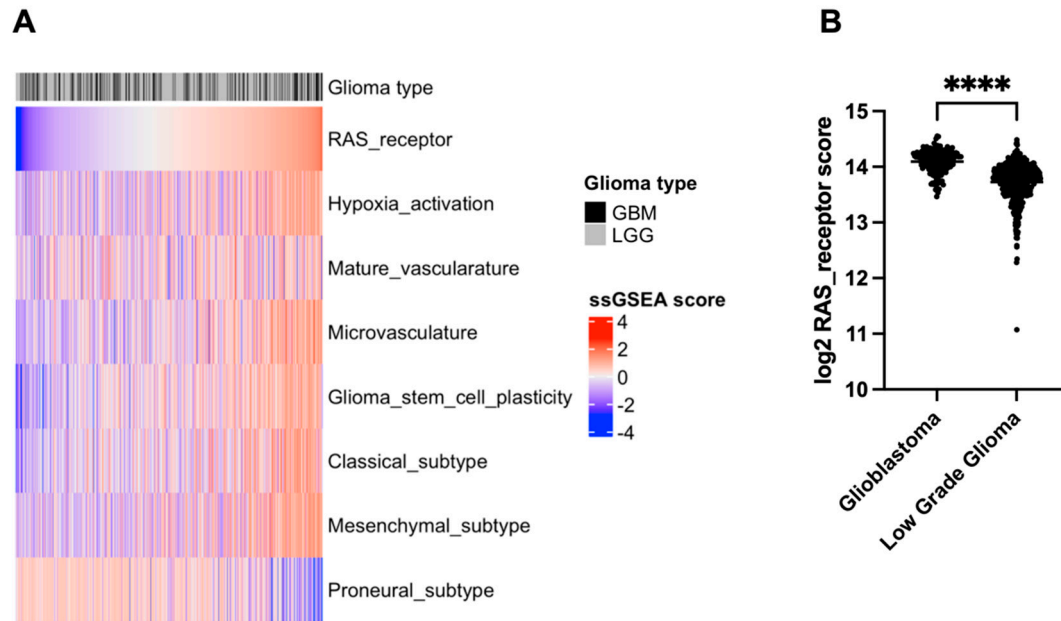

**Figure S4. RAS receptor expression and its relationship to tumour microenvironment pathways in TCGA glioma cases.** **A)** Log-transformed ssGSEA z-scores are represented for the RAS receptor pathway and TME-related pathways within glioma patient samples (glioblastoma and LGG). **B)** Comparison of RAS receptor ssGSEA score between glioblastoma and LGG cases within the TCGA. Statistical analysis was performed using an unpaired t-test (\*\*\*\* $p < 0.0001$ ), with  $p < 0.05$  considered significant.
