# Supplementary material for: Upregulation of the Renin–Angiotensin System Is Associated with Patient Survival and the Tumour Microenvironment in Glioblastoma
Source: Cells. 2024 Apr 5;13(7):634. doi: 10.3390/cells13070634 (PMC11012120; doi:10.3390/cells13070634)
Supplement: Supplementary file 1 [file cells-13-00634-s001.zip › Supplementary tables.xlsx]

## Sheet: Table S1
Table S1. Progression free survival and patient characteristic of TCGA glioblastoma cases
		Progression free survival
Clinical characteristics		Univariate			Multivariate
Variable	No. of patients	HR	CI	p value	HR	CI	p value
Age (years)		0.79	0.54-1.16	0.223
<62	72
>62	72
Sex		0.89	0.60-1.31	0.54
Male	72
Female	72
Subtype
Classical	39
Neural	23	1.16	0.65-2.05	0.62
Proneural	25	0.97	0.54-1.76	0.92
Mesenchymal	49	1.1	0.69-1.75	0.7
G-CIMP	7	0.38	0.14-1.09	0.07
NA	1
IDH1 mutation		0.31	0.097-0.98	0.045*	0.43 (ATP6AP2 multivariate) 0.46 (AGTR1 multivariate)	0.060-1.42 (ATP6AP2 multivariate) 0.14-1.5 (AGTR1 multivariate)	0.17 (ATP6AP2 multivariate) 0.20 (AGTR1 multivariate)
Wild-type	134
Mutant	6
NA	4
MGMT status		0.71	0.46-1.1	0.12
Non-methylated	64
Methylated	51
NA	29
Therapy
Chemotherapy only	2
Radiation only	37	0.3	0.07-1.30	0.11	0.37 (ATP6AP2 multivariate) 0.24 (AGTR1 multivariate)	0.086-1.63 (ATP6AP2 multivariate) 0.56-1.06 (AGTR1 multivariate)	0.19 (ATP6AP2 multivariate) 0.059 (AGTR1 multivariate)
Chemotherapy+radiation	97	0.2	0.048-0.82 (ATP6AP2 multivariate)	0.026*	0.25 (ATP6AP2 multivariate) 0.15 (AGTR1 multivariate)	0.060-1.04 (ATP6AP2 multivariate) 0.035-0.64 (AGTR1 multivariate)	0.057 (ATP6AP2 multivariate) 0.011* (AGTR1 multivariate)
NA	8
AGTR1		1.68	1.5-2.17	0.0083**	1.77	1.15-2.73	0.01*
High	72
Low	72
ATP6AP2		1.5	1.03-2.17	0.035*	1.49	0.99-2.23	0.055
High	72
Low	72

## Sheet: Table S2
Table S2. Overall survival and patient characteristic of TCGA glioblastoma cases
		Overall survival
Clinical characteristics		Univariate			Multivariate
Variable	No. of patients	HR	CI	p value	HR	CI	p value
Age (years)		1.13	0.78-1.65	0.52
<62	72
>62	72
Sex		1.08	0.73-1.59	0.69
Male	72
Female	72
Subtype
Classical	39
Neural	23	1.52	0.86-2.68	0.15	0.97 (AGTR1 multivariate) 0.98 (REN multivariate)	0.46-2.03 (AGTR1 multivariate) 0.47-2.05 (REN multivariate)	0.94 (AGTR1 multivariate) 0.96 (REN multivariate)
Proneural	25	1.7	0.97-2.98	0.06	1.13 (AGTR1 multivariate) 1.33 (REN multivariate)	0.53-2.40 (AGTR1 multivariate) 0.63-2.81 (REN multivariate)	0.75 (AGTR1 multivariate) 0.46
Mesenchymal	49	1.12	0.69-1.81	0.64	0.95 (AGTR1 multivariate) 1.07 (REN multivariate)	0.52-1.75 (AGTR1 multivariate) 0.57-2.01 (REN multivariate)	0.87 (AGTR1 multivariate) 0.83
G-CIMP	7	0.29	0.089-0.96	0.04*	1.17e-07 (AGTR1 multivariate) 1.59e-07 (REN multivariate)	0-inf (AGTR1 multivariate) 0-inf (REN multivariate)	1 (AGTR1 multivariate) 1 (REN multivariate)
NA	1
IDH1 mutation		0.27	0.08-0.84	0.024*	3.9e+06 (AGTR1 multivariate) 1.8e+06 (REN multivariate)	0-inf (AGTR1 multivariate) 0-inf (REN multivariate)	1 (AGTR1 multivariate) 1 (REN multivariate)
Wild-type	134
Mutant	6
NA	4
MGMT status		0.63	0.41-0.97	0.038*	0.59 (AGTR1 multivariate) 0.63 (REN multivariate)	0.37-0.97 (AGTR1 multivariate) 0.39-1.02 (REN multivariate)	0.036* (AGTR1 multivariate) 0.061 (REN multivariate)
Non-methylated	64
Methylated	51
NA	29
Therapy
Chemotherapy only	2
Radiation only	37	0.25	0.06-1.08	0.06	0.13 (AGTR1 multivariate) 0.16 (REN multivariate)	0.026-0.65 (AGTR1 multivariate) 1.05-4.8 (REN multivariate)	0.013* (AGTR1 multivariate) 0.0089** (REN multivariate)
Chemotherapy+radiation	97	0.09	0.02-0.39	0.0012**	0.058 (AGTR1 multivariate) 0.07 (REN multivariate)	0.012-0.29 (AGTR1 multivariate) 0.015-0.34 (REN multivariate)	0.00055*** (AGTR1 multivariate) 0.0009*** (REN multivariate)
NA	8
AGTR1		1.65	1.13-2.42	0.009**	1.55	0.93-2.59	0.095
High	72
Low	72
REN		1.53	0.89-2.65	0.13	2.25	1.05-4.8	0.036*
High	18
Low	126

## Sheet: Table S3
Table S3. List of genes from ssGSEA pathway analysis
RAS_receptor	Hypoxia_activation	Mature_vasculature	Microvasculature	Gioma_stem_cell_plasticity	Classical_subtype	Mesenchymal_subtype	Proneural_subtype
AGTR1	SSFA2	ALDH1A2	CPD	A2M	ABCD2	ACP3	ABAT
ATP6AP2	P4HA1	CTPS	FABPS	ACOT7	ACSBG1	ACSL1	ACTR1A
AGTR2	LGALS3	HOXA9	IRAK2	ACSL3	ACSL3	ADAM12	ADGRB3
	FOSL1	HS.554324	LHFP	ADGRG6	ACSS3	ALDH3B1	ADGRL3
	NAB2	LOC100130516	NCK1	ALDH1L1	ADAM19	ALOX5	ALCAM
	ALDOA	NCLN	NFKB1A	ALS2CL	ADGRE5	AMPD3	AMOTL2
	CA9	NUDT11	PDGFD	ANGPT1	ADGRG1	ANXA1	ARHGAP33
	NDRG1	SLC7A5	TSPAN18	ANLN	AKT2	ANXA2	ARHGEF9
	HSPB1	TPM2		APLP1	ANXA5	ANXA4	ASCL1
				ASPH	APBA3	ARHGAP29	ATAD5
				ASPM	ARAP2	ARPC1B	ATAT1
				ASS1	ARAP3	ARSJ	ATP1A3
				ATP9A	B3GALT1	ASL	BCAN
				AURKA	BLM	BATF	BCL7A
				AURKB	BMAL1	BDKRB2	BCOR
				BCAS1	BTBD2	BLVRB	BEX1
				BEX2	CALM1	BNC2	C1QL1
				BHLHE22	CAMK2B	C1orf54	CA10
				BIRC5	CARMIL1	C5AR1	CAMSAP2
				BMPER	CC2D1A	CASP1	CASK
				BMPR1B	CD151	CASP4	CBX1
				BUB1	CDH2	CASP5	CDC25A
				C1orf198	CDH4	CASP8	CDC7
				C4B	CDH6	CAST	CDK5R1
				CA3	CDK6	CAVIN1	CDKN1B
				CADM2	CLIP2	CCR5	CELF3
				CAMK2D	CREB5	CD14	CHD7
				CAP1	DAG1	CD2AP	CILK1
				CCN1	DENND2A	CD4	CKB
				CCNB1	DLC1	CDCP1	CLASP2
				CCNB2	DMWD	CEBPB	CLGN
				CCND1	DOCK6	CHI3L1	CNTN1
				CCND2	EGFR	CLCF1	CRB1
				CCNF	ELOVL2	CLEC2B	CRMP1
				CD24	EPHB4	CLIC1	CSNK1E
				CD302	ERCC2	CNN2	CSPG5
				CD36	EXTL3	COL1A1	CXXC4
				CD38	EYA2	COL1A2	DBN1
				CDC20	FBXO17	COL5A1	DCAF7
				CDC45	FGFR3	COL8A2	DCX
				CDCA3	FZD3	COLGALT1	DGKI
				CDCA8	FZD7	COPZ2	DLL3
				CDKN2A	GALNT4	CPQ	DNM3
				CDT1	GARRE1	CRYBG1	DPF1
				CEBPA	GAS1	CSTA	DPP6
				CENPN	GJA1	CTSB	DPYSL4
				CENPQ	GLG1	CTSC	DUSP26
				CHL1	GLI2	CTSZ	E2F3
				CHRDL1	GNAS	CYBRD1	EPB41
				CIT	GNG7	CYTH4	EPHB1
				CITED1	GRIK1	CYTIP	ERBB3
				CKS1B	GRIK5	DAB2	FAM110B
				CKS2	GSTK1	DCBLD2	FBXO21
				CLDN11	HMG20B	DOK3	FERMT1
				CLSPN	HS3ST3B1	DRAM1	FGF9
				CLU	HSPBP1	DSC2	FHOD3
				CNIH2	ILK	DSE	FLRT1
				COL4A6	IRF3	EFEMP2	FXYD6
				CP	IRS2	EHD2	GABRA3
				CPLX2	ITGA7	ELF4	GADD45G
				CPNE8	ITGB8	EMP3	GNG4
				CPPED1	JAG1	ENG	GPM6A
				CPQ	JUND	FCGR2A	GPR17
				CRLF1	KCNF1	FCGR2B	GRIA2
				CSDC2	KEAP1	FES	GRID2
				CSF2RA	KLHDC8A	FHL2	GSK3B
				CTNNAL1	KLHL25	FHOD1	GSTA4
				CTNNBIP1	KLHL4	FMNL1	HDAC2
				CTPS1	LAMB2	FNDC3B	HMGB3
				CTSV	LFNG	FOLR2	HOXD3
				DBF4	LHFPL6	FPR3	IL1RAPL1
				DDX39A	LMO2	FURIN	INAVA
				DECR1	LRFN3	FXYD5	JADE3
				DPYSL4	LRP10	GCNT1	JPT1
				DUSP4	LRP5	GNA15	KAT7
				DUSP6	MAB21L1	GRN	KDM1A
				DUT	MCC	HEXA	KIF21B
				E2F7	MEGF8	HEXB	KLRC3
				ECRG4	MEIS1	HFE	KLRC4
				ECT2	MEOX2	HK3	KLRK1
				EDNRB	MLC1	ICAM3	LPAR4
				EFHD2	MYO5C	IFI30	LRP6
				EPHB2	NDP	IGFBP6	LRRTM4
				ETV4	NES	IL15RA	MAP2
				ETV5	NOS2	IL1R1	MAPT
				EXO1	NPAS3	IL4R	MARCKS
				F3	NPEPL1	IQGAP1	MARCKSL1
				FBLN2	NR2E1	ITGA4	MAST1
				FBN2	NR2F6	ITGA5	MATR3
				FBXO32	OSBPL3	ITGAM	MCM10
				FEN1	PCSK5	ITGB2	MIR9-1HG
				FIGNL1	PDGFA	KYNU	MLLT11
				FLOT2	PEPD	LAIR1	MMP15
				FZD6	PIPOX	LAMB1	MMP16
				GABRB1	PLA2G5	LAPTM5	MPPED2
				GCAT	PLIN3	LCP1	MTSS1
				GNAO1	PMP22	LCP2	MVB12B
				GOLM1	POFUT1	LGALS1	MYB
				GPD1	POLR1G	LGALS3	MYO10
				GPD2	POMT2	LHFPL2	MYT1
				GPM6A	PRKD2	LILRB2	NCALD
				GPR137B	PRPF31	LILRB3	NCAM1
				H4C11	PTPN14	LOX	NKAIN1
				HELLS	PTPRA	LRRFIP1	NKX2-2
				HFE	QTRT1	LTBP1	NLGN3
				HIP1	R3HDM4	LTBP2	NOL4
				HOPX	RASGRP1	LY75	NR0B1
				HSPB8	RBCK1	LY96	NRXN1
				IER3	RBM42	MAFB	NRXN2
				IGFBP4	RFX2	MAN1A1	OLIG2
				IL13RA1	RFXANK	MAN2A1	P2RX7
				INCENP	RGS12	MAN2B1	PAFAH1B3
				JAG1	RGS6	MAPK13	PAK3
				JMJD8	RIN1	MCUB	PAK5
				KIF18A	SARS2	MFSD1	PCDH11X
				KIF22	SCAMP4	MGAT1	PCDH11Y
				KIF23	SEMA6A	MGST2	PDE10A
				KIF4A	SEMA6D	MRC2	PELI1
				LHFPL2	SEPTIN11	MS4A4A	PFN2
				LIG1	SHFL	MSR1	PHLPP1
				LMNB1	SHOX2	MVP	PLAAT1
				LRRFIP1	SIPA1L1	MYH9	PLCB4
				LSM12	SLC12A4	MYO1F	PODXL2
				LYN	SLC2A10	MYOF	PPM1D
				MAD2L1	SLC4A4	NCF2	PPM1E
				MAPK1IP1L	SLC6A11	NCF4	PURG
				MBP	SLC6A9	NOD2	RAB33A
				MCM2	SMO	NPC2	RAD21
				MCM3	SNTA1	NRP1	RALGPS1
				MCM4	SOCS2	P4HA2	RALGPS2
				MCM5	SOX9	PDPN	RAP2A
				MCM6	SPRY2	PHF11	RBPJ
				MELK	SSH3	PIGP	REEP1
				METRN	TBX2	PLA2G15	REXO5
				MFGE8	TEAD3	PLAU	RNFT2
				MIS18BP1	TGFB3	PLAUR	RUFY3
				MMP15	TGIF2	PLBD1	SATB1
				MT2A	TLE2	PLK3	SCG3
				MTHFD2	TMED1	PLS3	SCN3A
				MXRA8	TMEM147	POLD4	SEC61A2
				MYO1B	TMEM161A	PROCR	SEZ6L
				NASP	TRIB2	PTGER4	SLC1A1
				NAT8B	TRIP6	PTPN22	SLCO5A1
				NCDN	VAV3	PTPN6	SORCS3
				NDC80	VPS16	PTPRC	SOX10
				NES	WSCD1	PYGL	SOX11
				NRCAM	ZFHX4	RAB11FIP1	SOX2
				NUF2	ZNF112	RAB27A	SOX4
				NUP107	ZNF134	RAB32	SPTBN2
				NUPR1	ZNF20	RABGAP1L	SRGAP3
				NUSAP1	ZNF211	RAC2	STMN1
				NXPH1	ZNF227	RBKS	STMN4
				OMG	ZNF235	RBM47	TAF5
				OTX2	ZNF264	RBMS1	TMCC1
				PAQR8	ZNF304	RELB	TMEFF1
				PCLAF	ZNF419	RHOG	TMEM35A
				PDGFRA	ZNF446	RRAS	TMSB15A
				PDPN	ZNF45	RUNX2	TOP2B
				PFKP	ZNF606	S100A11	TOPBP1
				PIK3R3	ZNF671	S100A13	TOX3
				PLA2G7	ZNF8	S100A4	TSPAN3
				PLK1		SAT1	TTC3
				PLK4		SCPEP1	TTYH1
				PLLP		SEC24D	VAX2
				PLPP3		SERPINA1	VEZF1
				POLA1		SERPINE1	WASF1
				POLD1		SFT2D2	YPEL1
				POLE		SH2B3	ZC4H2
				PPP2R2B		SHC1	ZEB2
				PRC1		SIGLEC7	ZFP69B
				PRKAR1B		SIGLEC9	ZNF184
				PRXL2B		SLAMF8	ZNF248
				PSD		SLC10A3	ZNF286A
				PTPRD		SLC11A1	ZNF510
				RAB29		SLC16A3	ZNF711
				RAB33A		SP100	ZNF804A
				RACGAP1		SQOR	ZNF821
				RAD51		SRPX2
				RAD51AP1		ST14
				RAD54L		STAB1
				RASSF3		STAT6
				RBL1		STXBP2
				RBP1		SWAP70
				RCC1		SYNGR2
				REEP3		SYPL1
				RFC4		TCIRG1
				RLBP1		TEC
				RND3		TES
				RNF128		TGFBI
				ROBO2		TGFBR2
				RPGRIP1		TGOLN2
				RRM1		THBD
				RRM2		THBS1
				RTL8C		THEMIS2
				SCG3		TIMP1
				SCN1B		TLR2
				SDC4		TLR4
				SDK2		TMBIM1
				SEMA3A		TNFAIP3
				SERPINB6		TNFAIP8
				SGO2		TNFRSF11A
				SH3BP4		TNFRSF1A
				SHCBP1		TNFRSF1B
				SLC6A11		TRADD
				SLC6A6		TRIM22
				SMC2		TRIM38
				SMOC1		TRPM2
				SNX18		TYMP
				SOCS2		UAP1
				SPAG5		UCP2
				SPARCL1		VAMP5
				SPC25		VDR
				SPP1		WIPF1
				SPRY1		WWTR1
				SPRY4		YAP1
				SPSB4		ZNF217
				ST6GAL2
				SYT4
				TAGLN3
				TDRD7
				TESC
				THRSP
				TIMP4
				TK1
				TLE1
				TMEFF1
				TMEFF2
				TMOD1
				TOP2A
				TPX2
				TRIB2
				TRIM2
				TRIM62
				TUBA4A
				TUBB3
				UBE2T
				UCHL5
				UGT8
				UHRF1
				UNC5C
				UPP1
				USP1
				VAT1L
				VWA1
				VWC2
				VXN
				WNT7A
				ZFP28
				ZNF367
